# Supplementary material for: Development and Feasibility of an eHealth Diabetes Prevention Program Adapted for Older Adults—Results from a Randomized Control Pilot Study
Source: Nutrients. 2024 Mar 23;16(7):930. doi: 10.3390/nu16070930 (PMC11154527; doi:10.3390/nu16070930)
Supplement: Supplementary file 1 [file nutrients-16-00930-s001.zip]

Archive with 46 entries (46 files):
- nutrients-2902367-supplementary.pdf
- Session 15 _SUPP.pdf
- session 17_SUPP.pdf
- Session 21.pptx
- Session 21_SUPP.pdf
- Session 22.pptx
- Session 22_SUPP.pdf
- Session13.pptx
- Session13_Handout_SUPP.pdf
- Session13_SUPP.pdf
- Session14.pptx
- Session14_SUPP.pdf
- Session15.pptx
- Session16.pptx
- Session16_supp.pdf
- session17.pptx
- Session18.pptx
- Session18_SUPP.pdf
- Session19.pptx
- Session19_SUPP.pdf
- Session20.pptx
- Session20_SUPP.pdf
- Week1.pptx
- Week10.pptx
- Week10_SUPP.pdf
- Week11.pptx
- Week11_SUPP.pdf
- Week12.pptx
- Week12_SUPP.pdf
- Week1_SUPP.pdf
- Week2.pptx
- Week2_SUPP.pdf
- Week3.pptx
- Week3_SUPP.pdf
- Week4.pptx
- Week4_SUPP.pdf
- Week5.pptx
- Week5_SUPP.pdf
- Week6.pptx
- Week6_SUPP.pdf
- Week7.pptx
- Week7_SUPP.pdf
- Week8.pptx
- Week8_SUPP.pdf
- Week9.pptx
- Week9_SUPP.pdf
